# Supplementary material for: Occupational risk factors and exposure–response relationships for airway disease among health workers exposed to cleaning agents in tertiary hospitals
Source: HighWire-hosted journal article supplement (doi:10.1136/oemed-2022-108763), 2023-05-03
Supplement: oemed-2022-108763supp001_data_supplement.pdf [file oemed-2022-108763supp001_data_supplement.pdf]

**SUPPLEMENTARY MATERIAL:****Occupational risk factors and exposure-response relationships for airway disease among health workers exposed to cleaning agents in tertiary hospitals**

Hussein H. Mwanga<sup>1,2</sup>, Roslynn Baatjies<sup>1,3</sup>, Mohamed F. Jeebhay<sup>1</sup>

<sup>1</sup> Division of Occupational Medicine and Centre for Environmental & Occupational Health Research, School of Public Health, University of Cape Town, Cape Town, South Africa

<sup>2</sup> Department of Environmental and Occupational Health, School of Public Health and Social Sciences, Muhimbili University of Health and Allied Sciences, Dar es Salaam, Tanzania

<sup>3</sup> Department of Environmental and Occupational Studies, Faculty of Applied Sciences, Cape Peninsula University of Technology, Cape Town, South Africa

**Table S1: Cleaning-related tasks and control measures reported in the two hospitals**

|                                                                                         | South Africa<br>n (%) | Tanzania<br>n (%) |
|-----------------------------------------------------------------------------------------|-----------------------|-------------------|
| <b>No. of Departments investigated</b>                                                  | 36                    | 13                |
| <b>Cleaning-related tasks performed*</b>                                                |                       |                   |
| Hand washing / sanitising                                                               | 36 (100)              | 13 (100)          |
| Fixed surfaces cleaning and disinfection                                                | 35 (97)               | 13 (100)          |
| Medical instruments cleaning and disinfection                                           | 20 (56)               | 13 (100)          |
| Patients' skin / wound cleaning and disinfection                                        | 31 (86)               | 12 (92)           |
| Floor finishing tasks (stripping, waxing, buffing)                                      | 36 (100)              | 0 (0)             |
| Specimen preparation                                                                    | 19 (53)               | 8 (62)            |
| <b>The manner of cleaning products use: used more sprays or more wipes*</b>             |                       |                   |
| More wipes than sprays                                                                  | 32 (89)               | 13 (100)          |
| More sprays than wipes                                                                  | 3 (8)                 | 0 (0)             |
| Use sprays and wipes about equally                                                      | 1 (3)                 | 0 (0)             |
| <b>Control measures uptake</b>                                                          |                       |                   |
| <b>Engineering controls present*</b>                                                    |                       |                   |
| Extractor fans in the ceiling                                                           | 30 (83)               | 2 (15)            |
| Local exhaust ventilation system                                                        | 0 (0)                 | 0 (0)             |
| <b>Administrative controls present</b>                                                  |                       |                   |
| Training on adverse health effects due to cleaning agents**                             | 16 (44)               | 3 (23)            |
| Availability of Standard Operating Procedures document/s on how to use cleaning agents* | 13 (36)               | 11 (85)           |
| Housekeeping: Chemical spill / release observed*                                        | 0 (0)                 | 1 (8)             |
| <b>Personal protective equipment use*</b>                                               |                       |                   |
| Gloves                                                                                  | 36 (100)              | 13 (100)          |
| Protective clothing (aprons, overalls)                                                  | 29 (81)               | 3 (23)            |
| Eye protection (goggles, face shields)                                                  | 2 (6)                 | 0 (0)             |
| Foot protection (safety/gum boots)                                                      | 1 (3)                 | 3 (23)            |
| Air purifying half face respirator                                                      | 0 (0)                 | 0 (0)             |
| <b>Medical surveillance programme**</b>                                                 | 0 (0)                 | 0 (0)             |

\*: Information from walk-through surveys; \*\*: Information from interviews with nurse managers

**Table S2: Commonly used cleaning products in the two hospitals**

|                                                                | South Africa                |              | Tanzania                      |              |
|----------------------------------------------------------------|-----------------------------|--------------|-------------------------------|--------------|
|                                                                | N = 36 departments          |              | N = 13 departments            |              |
| <b>Medical instruments cleaning &amp; disinfection</b>         | <b>N = 20</b>               | <b>n (%)</b> | <b>N = 13</b>                 | <b>n (%)</b> |
|                                                                | Enzymatic cleaners          | 15 (42)      | Bleach                        | 10 (77)      |
|                                                                | Ortho-phthalaldehyde        | 13 (36)      | All-purpose cleaner           | 10 (77)      |
|                                                                | Alcohols                    | 7 (19)       | Enzymatic cleaners            | 5 (39)       |
|                                                                | Chlorhexidine               | 6 (17)       | Glutaraldehyde                | 4 (31)       |
|                                                                | Hydrogen peroxide           | 5 (14)       | Ortho-phthalaldehyde          | 3 (23)       |
| <b>Fixed surfaces cleaning &amp; disinfection</b>              | <b>N = 35</b>               | <b>n (%)</b> | <b>N = 13</b>                 | <b>n (%)</b> |
|                                                                | Bleach                      | 34 (94)      | Bleach                        | 13 (100)     |
|                                                                | Ammonia                     | 33 (92)      | All-purpose cleaner           | 13 (100)     |
|                                                                | Alcohols                    | 31 (86)      | Glass cleaner                 | 7 (54)       |
|                                                                | Dishwashing liquid          | 29 (81)      | Floor cleaner                 | 2 (15)       |
|                                                                | Air freshener               | 21 (58)      |                               |              |
| <b>Floor finishing tasks (stripping, waxing &amp; buffing)</b> | <b>N = 36</b>               | <b>n (%)</b> | <b>N = 0</b>                  | <b>n (%)</b> |
|                                                                | Floor stripper <sup>#</sup> | 36 (100)     |                               |              |
|                                                                | Floor wax <sup>*</sup>      | 36 (100)     |                               |              |
| <b>Specimen preparation</b>                                    | <b>N = 19</b>               | <b>n (%)</b> | <b>N = 8</b>                  | <b>n (%)</b> |
|                                                                | Formalin 10% solution       | 18 (50)      | Formalin 10% solution         | 8 (62)       |
|                                                                | Cytological fixative spray  | 14 (39)      |                               |              |
|                                                                | Alcohol solution            | 3 (8)        |                               |              |
|                                                                | Glutaraldehyde              | 1 (3)        |                               |              |
| <b>Patients' skin / wound cleaning &amp; disinfection</b>      | <b>N = 31</b>               | <b>n (%)</b> | <b>N = 12</b>                 | <b>n (%)</b> |
|                                                                | Alcohols                    | 27 (75)      | Alcohols                      | 12 (92)      |
|                                                                | Chlorhexidine               | 22 (61)      | Povidone iodine               | 11 (85)      |
|                                                                | Povidone iodine             | 15 (42)      | Chloroxymenol                 | 4 (31)       |
|                                                                | Ether                       | 6 (17)       | Hydrogen peroxide mouthwash   | 1 (8)        |
| <b>Hand washing / sanitising</b>                               | <b>N = 36</b>               | <b>n (%)</b> | <b>N = 12</b>                 | <b>n (%)</b> |
|                                                                | Chlorhexidine               | 36 (100)     | All-purpose cleaner (diluted) | 12 (92)      |
|                                                                | Liquid hand soap            | 33 (92)      | Alcohol sanitiser             | 8 (62)       |
|                                                                | Alcohol sanitiser           | 27 (75)      | Hand wash liquid soap         | 1 (8)        |
|                                                                | Povidone iodine             | 6 (17)       |                               |              |

N = number of departments assessed; n = number of departments conducting the task/s; \* = duration of buff sprays (diluted floor wax); # = Floor strippers were used only once a year in each department in the SAH

**Table S3: Respiratory symptoms and airway inflammation associated with specific medical instrument cleaning and disinfection agents in tertiary hospital health workers**

|                                                      | n (%)    | Asthma symptom score <sup>##</sup> | Asthma symptom score (≥2 vs 0-1) | WRONS                        | WRAS               | FeNO, ppb*<br>(n = 654)      | FeNO ≥ 50 ppb<br>(n = 654)  |
|------------------------------------------------------|----------|------------------------------------|----------------------------------|------------------------------|--------------------|------------------------------|-----------------------------|
| <b>Prevalence (%) (n = 697)</b>                      |          |                                    | 91 (13)                          | 109 (16)                     | 48 (7)             |                              | 41 (6)                      |
| <b>Medical instruments cleaning and disinfection</b> | 301 (43) | 1.14 (0.85 – 1.52)                 | 1.06 (0.67 – 1.68)               | 1.26 (0.83 – 1.92)           | 0.75 (0.41 – 1.40) | 1.06 (0.96 – 1.17)           | 1.34 (0.70 – 2.59)          |
| Ortho-phthalaldehyde                                 |          |                                    |                                  |                              |                    |                              |                             |
| Yes vs No                                            | 113 (16) | 1.09 (0.75 – 1.60)                 | 0.84 (0.45 – 1.58)               | 1.55 (0.92 – 2.60)           | 0.73 (0.30 – 1.77) | 1.10 (0.96 – 1.25)           | <b>2.81 (1.32 – 5.94)**</b> |
| 0 minutes / week                                     | 584 (86) | 1                                  | 1                                | 1                            | 1                  | 1                            | 1                           |
| 1 – 99 minutes / week                                | 64 (10)  | 1.28 (0.80 – 2.05)                 | 1.10 (0.52 – 2.32)               | 1.05 (0.51 – 2.16)           | 0.62 (0.18 – 2.07) | <b>1.19 (1.01 – 1.40)*</b>   | <b>3.73 (1.60 – 8.73)**</b> |
| ≥ 100 minutes / week                                 | 30 (4)   | 1.15 (0.58 – 2.26)                 | 0.72 (0.21 – 2.47)               | <b>3.22 (1.43 – 7.25)**</b>  | 1.47 (0.42 – 5.16) | 0.98 (0.78 – 1.23)           | 0.77 (0.10 – 6.02)          |
| Glutaraldehyde                                       |          |                                    |                                  |                              |                    |                              |                             |
| Yes vs No                                            | 49 (7)   | 1.03 (0.59 – 1.81)                 | 1.17 (0.50 – 2.75)               | 1.42 (0.68 – 2.96)           | 1.14 (0.39 – 3.37) | 0.89 (0.73 – 1.07)           | 0.88 (0.26 – 3.02)          |
| 0 minutes / week                                     | 648 (94) | 1                                  | 1                                | 1                            | 1                  | 1                            | 1                           |
| 1 – 99 minutes / week                                | 28 (4)   | 1.14 (0.56 – 2.30)                 | 1.18 (0.39 – 3.57)               | 0.66 (0.20 – 2.24)           | 1.00 (0.23 – 4.40) | 0.93 (0.73 – 1.18)           | 1.18 (0.26 – 5.30)          |
| ≥ 100 minutes / week                                 | 16 (2)   | 0.79 (0.27 – 2.34)                 | 1.07 (0.23 – 4.93)               | <b>4.47 (1.61 – 12.45)**</b> | 2.02 (0.43 – 9.47) | 0.88 (0.64 – 1.23)           | 0.79 (0.10 – 6.35)          |
| Enzymatic cleaners                                   |          |                                    |                                  |                              |                    |                              |                             |
| Yes vs No                                            | 113 (16) | 1.16 (0.80 – 1.70)                 | 1.17 (0.65 – 2.10)               | 1.20 (0.70 – 2.06)           | 1.39 (0.66 – 2.91) | 1.12 (0.99 – 1.28)           | <b>2.20 (1.04 – 4.65)*</b>  |
| 0 minutes / week                                     | 584 (87) | 1                                  | 1                                | 1                            | 1                  | 1                            | 1                           |
| 1 – 99 minutes / week                                | 46 (7)   | 1.52 (0.89 – 2.59)                 | 1.72 (0.78 – 3.80)               | 0.66 (0.25 – 1.74)           | 1.64 (0.60 – 4.47) | 1.18 (0.97 – 1.43)           | <b>3.90 (1.53 – 9.98)**</b> |
| ≥ 100 minutes / week                                 | 43 (6)   | 1.15 (0.64 – 2.09)                 | 0.95 (0.36 – 2.54)               | <b>2.59 (1.29 – 5.20)**</b>  | 1.18 (0.34 – 4.05) | 1.00 (0.82 – 1.22)           | 0.98 (0.22 – 4.37)          |
| Chlorhexidine                                        |          |                                    |                                  |                              |                    |                              |                             |
| Yes vs No                                            | 84 (12)  | 1.26 (0.83 – 1.92)                 | 0.85 (0.43 – 1.71)               | 0.66 (0.33 – 1.34)           | 0.61 (0.21 – 1.76) | <b>1.31 (1.13 – 1.51)***</b> | 2.13 (0.91 – 4.99)          |
| 0 minutes / week                                     | 613 (91) | 1                                  | 1                                | 1                            | 1                  | 1                            | 1                           |
| 1 – 99 minutes / week                                | 44 (7)   | 1.41 (0.81 – 2.45)                 | 0.64 (0.22 – 1.87)               | 0.64 (0.25 – 1.69)           | NC                 | <b>1.38 (1.14 – 1.66)**</b>  | <b>2.91 (1.02 – 8.35)*</b>  |
| ≥ 100 minutes / week                                 | 13 (2)   | 1.54 (0.60 – 3.95)                 | 0.94 (0.20 – 4.41)               | 1.52 (0.41 – 5.71)           | 0.96 (0.12 – 7.78) | 1.11 (0.79 – 1.55)           | NC                          |

Data are presented as OR (95% CI), unless otherwise indicated. ##: mean ratio (95% CI); OR: odds ratio; CI: confidence interval; \*: Geometric mean ratio (95% Confidence Interval); NC: not calculable

Adjusted for atopy, gender and smoking; \*: p-value < 0.05; \*\*: p-value < 0.01; \*\*\*: p-value < 0.001;

WRONS: Work-related ocular–nasal symptoms (ocular–nasal symptoms experienced at work in the past 12 months that gets better when away from work OR worsen on return to work;

WRAS: Work-related asthma symptoms (asthma symptoms experienced at work in the past 12 months that gets better when away from work OR worsen on return to work.

**Table S3 (contd.): Respiratory symptoms and airway inflammation associated with specific medical instrument cleaning and disinfection agents in tertiary hospital health workers**

|                                 | n (%)    | Asthma symptom score <sup>##</sup> | Asthma symptom score (≥2 vs 0-1) | WRONS                         | WRAS                       | FeNO, ppb <sup>†</sup><br>(n = 654) | FeNO ≥ 50 ppb<br>(n = 654)  |
|---------------------------------|----------|------------------------------------|----------------------------------|-------------------------------|----------------------------|-------------------------------------|-----------------------------|
| <b>Prevalence (%) (n = 697)</b> |          |                                    | 91 (13)                          | 109 (16)                      | 48 (7)                     |                                     | 41 (6)                      |
| Quaternary ammonium compounds   |          |                                    |                                  |                               |                            |                                     |                             |
| Yes vs No                       | 26 (4)   | 1.02 (0.49 – 2.13)                 | 1.41 (0.49 – 4.02)               | 0.91 (0.30 – 2.74)            | 2.09 (0.59 – 7.44)         | 1.20 (0.94 – 1.53)                  | 2.77 (0.75 – 10.21)         |
| 0 minutes / week                | 671 (97) | 1                                  | 1                                | 1                             | 1                          | 1                                   | 1                           |
| 1 – 99 minutes / week           | 15 (2)   | 0.84 (0.29 – 2.42)                 | 0.99 (0.21 – 4.75)               | 0.34 (0.04 – 2.69)            | NC                         | 1.26 (0.92 – 1.74)                  | <b>5.31 (1.32 – 21.28)*</b> |
| ≥ 100 minutes / week            | 3 (1)    | 1.83 (0.29 – 11.57)                | 2.94 (0.25 – 34.30)              | <b>12.08 (1.05 – 138.76)*</b> | 8.34 (0.62 – 111.58)       | 1.50 (0.74 – 3.04)                  | NC                          |
| Hydrogen peroxide               |          |                                    |                                  |                               |                            |                                     |                             |
| Yes vs No                       | 40 (6)   | 1.44 (0.81 – 2.56)                 | 1.48 (0.62 – 3.53)               | 1.66 (0.76 – 3.61)            | <b>3.14 (1.29 – 7.66)*</b> | 1.11 (0.91 – 1.37)                  | 2.51 (0.90 – 7.04)          |
| 0 minutes / week                | 657 (95) | 1                                  | 1                                | 1                             | 1                          | 1                                   | 1                           |
| 1 – 99 minutes / week           | 27 (4)   | 1.71 (0.87 – 3.36)                 | 1.91 (0.73 – 5.03)               | 2.01 (0.82 – 4.95)            | <b>2.99 (1.06 – 8.45)*</b> | 1.14 (0.88 – 1.46)                  | 1.96 (0.54 – 7.06)          |
| ≥ 100 minutes / week            | 7 (1)    | 0.97 (0.21 – 4.48)                 | NC                               | 1.05 (0.12 – 8.91)            | NC                         | 0.97 (0.61 – 1.55)                  | 4.29 (0.46 – 40.10)         |
| Alcohols                        |          |                                    |                                  |                               |                            |                                     |                             |
| Yes vs No                       | 104 (15) | 0.93 (0.62 – 1.39)                 | 0.81 (0.42 – 1.57)               | 1.07 (0.60 – 1.90)            | 0.75 (0.31 – 1.82)         | 1.01 (0.89 – 1.16)                  | 1.42 (0.62 – 3.24)          |
| 0 minutes / week                | 593 (88) | 1                                  | 1                                | 1                             | 1                          | 1                                   | 1                           |
| 1 – 99 minutes / week           | 64 (10)  | 1.03 (0.63 – 1.69)                 | 1.02 (0.48 – 2.18)               | 0.56 (0.23 – 1.35)            | 0.78 (0.27 – 2.29)         | 1.01 (0.85 – 1.19)                  | 1.75 (0.68 – 4.49)          |
| ≥ 100 minutes / week            | 16 (2)   | 1.12 (0.45 – 2.80)                 | 0.93 (0.20 – 4.26)               | <b>4.40 (1.58 – 12.26)**</b>  | 0.85 (0.11 – 6.75)         | 1.21 (0.89 – 1.65)                  | 1.25 (0.15 – 10.17)         |
| Bleach                          |          |                                    |                                  |                               |                            |                                     |                             |
| Yes vs No                       | 204 (29) | 0.91 (0.66 – 1.26)                 | 0.86 (0.51 – 1.44)               | 1.21 (0.77 – 1.90)            | 0.74 (0.37 – 1.47)         | 0.90 (0.81 – 1.00)                  | 0.71 (0.34 – 1.50)          |
| 0 minutes / week                | 493 (75) | 1                                  | 1                                | 1                             | 1                          | 1                                   | 1                           |
| 1 – 99 minutes / week           | 89 (14)  | 0.96 (0.63 – 1.48)                 | 0.82 (0.40 – 1.69)               | 0.72 (0.35 – 1.47)            | 0.26 (0.06 – 1.11)         | 0.94 (0.81 – 1.08)                  | 0.67 (0.23 – 1.98)          |
| ≥ 100 minutes / week            | 75 (11)  | 0.88 (0.55 – 1.43)                 | 0.80 (0.36 – 1.78)               | <b>2.50 (1.41 – 4.43)**</b>   | 1.36 (0.60 – 3.09)         | 0.87 (0.75 – 1.02)                  | 0.72 (0.24 – 2.13)          |

Data are presented as OR (95% CI), unless otherwise indicated. ##: mean ratio (95% CI); OR: odds ratio; CI: confidence interval; \*: Geometric mean ratio (95% Confidence Interval); NC: not calculable  
Adjusted for atopy, gender and smoking; \*: p-value < 0.05; \*\*: p-value < 0.01; \*\*\*: p-value < 0.001;  
WRONS: Work-related ocular–nasal symptoms (ocular–nasal symptoms experienced at work in the past 12 months that gets better when away from work OR worsen on return to work;  
WRAS: Work-related asthma symptoms (asthma symptoms experienced at work in the past 12 months that gets better when away from work OR worsen on return to work.

**Table S4: Respiratory symptoms and airway inflammation associated with specific medical instrument cleaning and disinfection tasks in tertiary hospital health workers**

|                                                                          | n (%)    | Asthma symptom score <sup>##</sup> | Asthma symptom score (≥2 vs 0-1) | WRONS                        | WRAS                | FeNO, ppb <sup>*</sup><br>(n = 654) | FeNO <sub>≥ 50 ppb</sub><br>(n = 654) |
|--------------------------------------------------------------------------|----------|------------------------------------|----------------------------------|------------------------------|---------------------|-------------------------------------|---------------------------------------|
| <b>Prevalence (%) (n = 697)</b>                                          |          |                                    | 91 (13)                          | 109 (16)                     | 48 (7)              |                                     | 41 (6)                                |
| <b>Medical instruments cleaning and disinfection</b>                     | 301 (43) |                                    |                                  |                              |                     |                                     |                                       |
| Medical instruments cleaning & disinfecting tasks <sup>**</sup>          | 331 (48) | 1.31 (0.97 – 1.75)                 | 1.28 (0.81 – 2.03)               | 1.07 (0.70 – 1.64)           | 0.90 (0.49 – 1.65)  | <b>1.13 (1.03 – 1.25)*</b>          | 1.55 (0.80 – 3.02)                    |
| Manually disassembling instruments, removing/flushing gross contaminants |          |                                    |                                  |                              |                     |                                     |                                       |
| Yes vs No                                                                | 201 (29) | <b>1.41 (1.04 – 1.92)*</b>         | 1.31 (0.81 – 2.12)               | 1.08 (0.69– 1.70)            | 1.14 (0.60 – 2.17)  | <b>1.14 (1.03 – 1.27)*</b>          | 1.69 (0.85 – 3.37)                    |
| 0 minutes / week                                                         | 496 (71) | 1                                  | 1                                | 1                            | 1                   | 1                                   | 1                                     |
| 1 – 99 minutes / week                                                    | 133 (19) | <b>1.44 (1.01 – 2.07)*</b>         | 1.42 (0.82 – 2.46)               | 0.78 (0.44– 1.39)            | 1.17 (0.55 – 2.47)  | <b>1.18 (1.05 – 1.34)**</b>         | 2.02 (0.94 – 4.37)                    |
| ≥ 100 minutes / week                                                     | 68 (10)  | 1.34 (0.84 – 2.14)                 | 1.10 (0.51 – 2.37)               | 1.77 (0.95 – 3.29)           | 1.09 (0.40 – 2.92)  | 1.06 (0.90 – 1.26)                  | 1.18 (0.39 – 3.57)                    |
| Diluting or mixing cleaning products                                     |          |                                    |                                  |                              |                     |                                     |                                       |
| Yes vs No                                                                | 251 (36) | 1.20 (0.89 – 1.61)                 | 1.09 (0.68 – 1.74)               | 1.24 (0.81 – 1.90)           | 0.96 (0.51 – 1.78)  | 1.06 (0.96 – 1.17)                  | 1.32 (0.68 – 2.56)                    |
| 0 minutes / week                                                         | 446 (64) | 1                                  | 1                                | 1                            | 1                   | 1                                   | 1                                     |
| 1 – 99 minutes / week                                                    | 213 (31) | 1.19 (0.87 – 1.63)                 | 1.12 (0.69 – 1.82)               | 1.22 (0.78 – 1.91)           | 0.99 (0.52 – 1.90)  | 1.03 (0.93 – 1.14)                  | 1.26 (0.63 – 2.54)                    |
| ≥ 100 minutes / week                                                     | 38 (5)   | 1.20 (0.65 – 2.23)                 | 0.94 (0.34 – 2.57)               | 1.35 (0.56 – 3.24)           | 0.74 (0.17 – 3.26)  | 1.23 (0.99 – 1.53)                  | 1.70 (0.47 – 6.18)                    |
| Changing sterilisation solutions                                         |          |                                    |                                  |                              |                     |                                     |                                       |
| Yes vs No                                                                | 157 (23) | <b>1.40 (1.00 – 1.94)*</b>         | 1.36 (0.81 – 2.29)               | 1.49 (0.93 – 2.38)           | 0.79 (0.37 – 1.70)  | 1.05 (0.93 – 1.17)                  | 1.24 (0.58 – 2.64)                    |
| 0 minutes / week                                                         | 540 (78) | 1                                  | 1                                | 1                            | 1                   | 1                                   | 1                                     |
| 1 – 99 minutes / week                                                    | 135 (19) | <b>1.48 (1.04 – 2.08)*</b>         | 1.56 (0.92 – 2.68)               | 1.21 (0.72 – 2.04)           | 0.80 (0.36 – 1.78)  | 1.02 (0.91 – 1.16)                  | 1.30 (0.59 – 2.86)                    |
| ≥ 100 minutes / week                                                     | 22 (3)   | 0.89 (0.37– 2.15)                  | 0.34 (0.04 – 2.59)               | <b>3.97 (1.55 – 10.15)**</b> | 0.75 (0.10 – 5.83)  | 1.19 (0.90 – 1.57)                  | 0.89 (0.11 – 7.08)                    |
| Manually sterilise/disinfection of medical instruments                   |          |                                    |                                  |                              |                     |                                     |                                       |
| Yes vs No                                                                | 143 (21) | <b>1.45 (1.03 – 2.03)*</b>         | 1.36 (0.80 – 2.31)               | 1.18 (0.71 – 1.96)           | 0.90 (0.42 – 1.94)  | <b>1.16 (1.03 – 1.31)*</b>          | 1.60 (0.74 – 3.46)                    |
| 0 minutes / week                                                         | 554 (80) | 1                                  | 1                                | 1                            | 1                   | 1                                   | 1                                     |
| 1 – 99 minutes / week                                                    | 106 (15) | <b>1.52 (1.04 – 2.21)*</b>         | 1.45 (0.81 – 2.60)               | 0.82 (0.44 – 1.53)           | 0.80 (0.33 – 1.97)  | <b>1.16 (1.01 – 1.32)*</b>          | 1.92 (0.86 – 4.32)                    |
| ≥ 100 minutes / week                                                     | 37 (5)   | 1.25 (0.68– 2.33)                  | 1.11 (0.41 – 3.01)               | <b>2.58 (1.20 – 5.55)*</b>   | 1.22 (0.35 – 4.25)  | 1.18 (0.95– 1.48)                   | 0.64 (0.08 – 4.95)                    |
| Sterilise medical instruments using automated systems                    |          |                                    |                                  |                              |                     |                                     |                                       |
| Yes vs No                                                                | 15 (2)   | 1.84 (0.77 – 4.40)                 | 2.39 (0.72 – 7.91)               | 1.38 (0.38 – 5.01)           | 2.41 (0.51 – 11.43) | 1.33 (0.97 – 1.83)                  | 2.60 (0.53 – 12.77)                   |
| 0 minutes / week                                                         | 682 (98) | 1                                  | 1                                | 1                            | 1                   | 1                                   | 1                                     |
| 1 – 99 minutes / week                                                    | 8 (1)    | 1.78 (0.53 – 6.02)                 | 2.21 (0.42 – 11.50)              | NC                           | 2.76 (0.31 – 24.29) | 1.18 (0.76 – 1.82)                  | 2.54 (0.27 – 24.08)                   |
| ≥ 100 minutes / week                                                     | 7 (1)    | 1.90 (0.55 – 6.57)                 | 2.62 (0.48 – 14.39)              | 4.29 (0.94 – 19.62)          | 2.13 (0.24 – 18.76) | 1.53 (0.97 – 2.43)                  | 2.66 (0.29 – 24.39)                   |

Data are presented as OR (95% CI), unless otherwise indicated. ##: mean ratio (95% CI); OR: odds ratio; CI: confidence interval; \*: Geometric mean ratio (95% Confidence Interval); NC: not calculable

Adjusted for atopy, gender and smoking; \*: p-value < 0.05; \*\*: p-value < 0.01; \*\*\*: p-value < 0.001;

WRONS: Work-related ocular–nasal symptoms (ocular–nasal symptoms experienced at work in the past 12 months that gets better when away from work OR worsen on return to work;

WRAS: Work-related asthma symptoms (asthma symptoms experienced at work in the past 12 months that gets better when away from work OR worsen on return to work;

\*\*\*: A combined variable consisting of 5 tasks involved in medical instruments cleaning and disinfection i.e. pre-cleaning of instruments by removing/flushing gross contaminants, diluting/mixing cleaning products, changing sterilization solutions, manually sterilize/disinfection of medical instruments and sterilize medical instruments using automated systems;

**Table S5: Respiratory symptoms and airway inflammation associated with specific chemical agents and tasks used in fixed surface cleaning and disinfection in tertiary hospital health workers**

|                                                        | n (%)    | Asthma symptom score <sup>##</sup> | Asthma symptom score (≥2 vs 0-1) | WRONS              | WRAS               | FeNO, ppb <sup>‡</sup><br>(n = 654) | FeNO <sub>≥ 50</sub> ppb<br>(n = 654) |
|--------------------------------------------------------|----------|------------------------------------|----------------------------------|--------------------|--------------------|-------------------------------------|---------------------------------------|
| <b>Prevalence (%) (n = 697)</b>                        |          |                                    | 91 (13)                          | 109 (16)           | 48 (7)             |                                     | 41 (6)                                |
| <b>Fixed surfaces cleaning and disinfection Agents</b> | 572 (82) | 1.40 (0.92 – 2.13)                 | 1.56 (0.77 – 3.15)               | 0.83 (0.48 – 1.42) | 0.90 (0.40 – 2.02) | 1.12 (0.98 – 1.28)                  | 1.05 (0.44 – 2.54)                    |
| Ammonia                                                |          |                                    |                                  |                    |                    |                                     |                                       |
| Yes vs No                                              | 73 (11)  | 0.96 (0.61 – 1.52)                 | 1.06 (0.53 – 2.11)               | 0.87 (0.44 – 1.75) | 0.15 (0.02 – 1.14) | 1.00 (0.86 – 1.17)                  | 1.30 (0.47 – 3.54)                    |
| 0 minutes / week                                       | 624 (95) | 1                                  | 1                                | 1                  | 1                  | 1                                   | 1                                     |
| 1 – 99 minutes / week                                  | 24 (4)   | 1.60 (0.81 – 3.17)                 | <b>2.76 (1.11 – 6.90)*</b>       | 1.29 (0.47 – 3.58) | NC                 | 1.12 (0.87 – 1.45)                  | 0.65 (0.08 – 5.07)                    |
| ≥ 100 minutes / week                                   | 9 (1)    | 0.34 (0.06 – 1.85)                 | NC                               | 0.62 (0.08 – 5.20) | NC                 | 0.97 (0.62 – 1.50)                  | 3.17 (0.32 – 31.04)                   |
| Bleach                                                 |          |                                    |                                  |                    |                    |                                     |                                       |
| Yes vs No                                              | 474 (68) | 1.10 (0.80 – 1.52)                 | 1.02 (0.62 – 1.69)               | 0.94 (0.60 – 1.47) | 1.09 (0.56 – 2.14) | 1.05 (0.95 – 1.17)                  | 1.12 (0.54 – 2.34)                    |
| 0 minutes / week                                       | 223 (40) | 1                                  | 1                                | 1                  | 1                  | 1                                   | 1                                     |
| 1 – 99 minutes / week                                  | 154 (27) | <b>1.52 (1.04 – 2.22)*</b>         | 1.52 (0.84 – 2.75)               | 0.77 (0.42 – 1.40) | 0.66 (0.25 – 1.71) | 1.14 (0.99 – 1.30)                  | 1.48 (0.62 – 3.52)                    |
| ≥ 100 minutes / week                                   | 189 (33) | 0.95 (0.65 – 1.40)                 | 0.89 (0.48 – 1.66)               | 1.35 (0.80 – 2.26) | 1.58 (0.75 – 3.32) | 1.03 (0.91 – 1.17)                  | 1.32 (0.58 – 3.04)                    |
| <b>Tasks</b>                                           |          |                                    |                                  |                    |                    |                                     |                                       |
| Use more sprays vs more wipes                          | 18 (3)   | <b>3.00 (1.50 – 5.98)**</b>        | <b>5.58 (2.04 – 15.24)**</b>     | 0.59 (0.13 – 2.66) | 1.65 (0.35 – 7.81) | 0.97 (0.72 – 1.30)                  | 0.70 (0.09 – 5.63)                    |
| Spray deodorant/ disinfectant                          |          |                                    |                                  |                    |                    |                                     |                                       |
| Yes vs No                                              | 208 (30) | <b>1.46 (1.08 – 1.99)*</b>         | 1.54 (0.95 – 2.47)               | 1.06 (0.67 – 1.68) | 0.87 (0.44 – 1.70) | <b>1.20 (1.08 – 1.33)**</b>         | 1.76 (0.89 – 3.45)                    |
| 0 minutes / week                                       | 489 (78) | 1                                  | 1                                | 1                  | 1                  | 1                                   | 1                                     |
| 1 – 99 minutes / week                                  | 128 (20) | <b>1.76 (1.23 – 2.52)**</b>        | <b>2.00 (1.17 – 3.44)*</b>       | 1.24 (0.73 – 2.09) | 0.88 (0.39 – 1.99) | <b>1.23 (1.09 – 1.39)**</b>         | 1.81 (0.82 – 3.98)                    |
| ≥ 100 minutes / week                                   | 12 (2)   | 0.92 (0.29 – 2.89)                 | 0.66 (0.08 – 5.45)               | 0.48 (0.06 – 3.76) | NC                 | 1.05 (0.74 – 1.49)                  | 1.70 (0.20 – 14.24)                   |
| Terminal cleaning of patient rooms                     |          |                                    |                                  |                    |                    |                                     |                                       |
| Yes vs No                                              | 159 (23) | 1.05 (0.74 – 1.47)                 | 1.05 (0.62 – 1.79)               | 0.64 (0.37 – 1.11) | 0.88 (0.42 – 1.83) | 1.10 (0.98 – 1.24)                  | 1.32 (0.61 – 2.84)                    |
| 0 minutes / week                                       | 538 (87) | 1                                  | 1                                | 1                  | 1                  | 1                                   | 1                                     |
| 1 – 99 minutes / week                                  | 59 (10)  | 1.24 (0.76 – 2.04)                 | 1.26 (0.59 – 2.69)               | 0.90 (0.42 – 1.92) | 0.91 (0.31 – 2.70) | 1.08 (0.90 – 1.28)                  | 1.41 (0.46 – 4.29)                    |
| ≥ 100 minutes / week                                   | 21 (3)   | 1.29 (0.58 – 2.88)                 | 1.51 (0.47 – 4.87)               | 0.53 (0.12 – 2.34) | 0.64 (0.08 – 4.94) | 1.08 (0.82 – 1.42)                  | 0.93 (0.12 – 7.41)                    |

Data are presented as OR (95% CI), unless otherwise indicated. ##: mean ratio (95% CI); OR: odds ratio; CI: confidence interval; ‡: Geometric mean ratio (95% Confidence Interval); NC: not calculable  
Adjusted for atopy, gender and smoking; \*: p-value < 0.05; \*\*: p-value < 0.01; \*\*\*: p-value < 0.001;  
WRONS: Work-related ocular–nasal symptoms (ocular–nasal symptoms experienced at work in the past 12 months that gets better when away from work OR worsen on return to work;  
WRAS: Work-related asthma symptoms (asthma symptoms experienced at work in the past 12 months that gets better when away from work OR worsen on return to work.

**Table S6: Respiratory symptoms and airway inflammation associated with specific chemicals used in specimen preparation in tertiary hospital health workers**

|                                          | n (%)     | Asthma symptom score <sup>##</sup> | Asthma symptom score (≥2 vs 0-1) | WRONS               | WRAS               | FeNO, ppb <sup>*</sup><br>(n = 654) | FeNO ≥ 50 ppb<br>(n = 654) |
|------------------------------------------|-----------|------------------------------------|----------------------------------|---------------------|--------------------|-------------------------------------|----------------------------|
| <b>Prevalence (%) (n = 697)</b>          |           |                                    | 91 (13)                          | 109 (16)            | 48 (7)             |                                     | 41 (6)                     |
| <b>Specimen preparation products</b>     | 157 (23)  | 1.36 (0.98 – 1.90)                 | 1.21 (0.72 – 2.04)               | 1.43 (0.89 – 2.29)  | 1.27 (0.65 – 2.48) | <b>1.20 (1.07 – 1.35)**</b>         | 1.25 (0.58 – 2.67)         |
| Formalin 10% in normal saline            |           |                                    |                                  |                     |                    |                                     |                            |
| Yes vs No                                | 146 (21)  | 1.34 (0.96 – 1.88)                 | 1.17 (0.68 – 1.99)               | 1.39 (0.86 – 2.24)  | 1.21 (0.61 – 2.42) | <b>1.19 (1.06 – 1.34)**</b>         | 1.15 (0.52 – 2.52)         |
| 0 minutes / week                         | 549 (82)  | 1                                  | 1                                | 1                   | 1                  | 1                                   | 1                          |
| 1 – 99 minutes / week                    | 110 (17)  | <b>1.55 (1.07 – 2.26)*</b>         | 1.26 (0.70 – 2.27)               | 1.56 (0.93 – 2.64)  | 1.22 (0.56 – 2.64) | <b>1.20 (1.05 – 1.38)**</b>         | 1.32 (0.58 – 3.00)         |
| ≥ 100 minutes / week                     | 5 (1)     | 0.67 (0.10 – 4.29)                 | NC                               | 1.51 (0.17 – 13.77) | NC                 | 1.18 (0.68 – 2.04)                  | NC                         |
| Alcohol-based cytological fixative spray |           |                                    |                                  |                     |                    |                                     |                            |
| Yes vs No                                | 25 (4)    | 1.34 (0.66 – 2.73)                 | 1.67 (0.63 – 4.43)               | 2.10 (0.84 – 5.24)  | 1.67 (0.47 – 5.92) | <b>1.33 (1.04 – 1.71)*</b>          | 2.27 (0.62 – 8.35)         |
| 0 minutes / week                         | 672 (98)  | 1                                  | 1                                | 1                   | 1                  | 1                                   | 1                          |
| 1 – 99 minutes / week                    | 17 (2)    | 1.56 (0.67 – 3.66)                 | 1.28 (0.71 – 2.30)               | 2.30 (0.78 – 6.73)  | 1.67 (0.36 – 7.78) | <b>1.55 (1.15 – 2.09)**</b>         | 3.62 (0.93 – 14.17)        |
| ≥ 100 minutes / week                     | 0 (0)     | NC                                 | NC                               | NC                  | NC                 | NC                                  | NC                         |
| Solvents                                 |           |                                    |                                  |                     |                    |                                     |                            |
| Yes vs No                                | 2 (0)     | 3.27 (0.41 – 25.87)                | 4.64 (0.28 – 77.99)              | NC                  | NC                 | 0.85 (0.36 – 2.02)                  | NC                         |
| 0 minutes / week                         | 695 (100) | 1                                  | 1                                | 1                   | 1                  | 1                                   | 1                          |
| 1 – 99 minutes / week                    | 2 (0)     | 3.27 (0.41 – 25.87)                | 4.64 (0.28 – 77.99)              | NC                  | NC                 | 0.85 (0.36 – 2.02)                  | NC                         |
| ≥ 100 minutes / week                     | 0 (0)     | NC                                 | NC                               | NC                  | NC                 | NC                                  | NC                         |

Data are presented as OR (95% CI), unless otherwise indicated. ##: mean ratio (95% CI); OR: odds ratio; CI: confidence interval; \*: Geometric mean ratio (95% Confidence Interval); NC: not calculable  
Adjusted for atopy, gender and smoking; \*: p-value < 0.05; \*\*: p-value < 0.01; \*\*\*: p-value < 0.001;  
WRONS: Work-related ocular–nasal symptoms (ocular–nasal symptoms experienced at work in the past 12 months that gets better when away from work OR worsen on return to work;  
WRAS: Work-related asthma symptoms (asthma symptoms experienced at work in the past 12 months that gets better when away from work OR worsen on return to work.



**Table S7: Respiratory symptoms and airway inflammation associated with specific chemical agents and tasks used for patients' skin/wound cleaning and disinfection in tertiary hospital health workers**

|                                                       | n (%)    | Asthma symptoms score <sup>##</sup> | Asthma symptoms (≥2 vs 0-1) | WRONS                      | WRAS                        | FeNO, ppb <sup>†</sup><br>(n = 654) | FeNO ≥ 50 ppb<br>(n = 654)    |
|-------------------------------------------------------|----------|-------------------------------------|-----------------------------|----------------------------|-----------------------------|-------------------------------------|-------------------------------|
| <b>Prevalence (%) (n = 697)</b>                       |          |                                     | 91 (13)                     | 109 (16)                   | 48 (7)                      |                                     | 41 (6)                        |
| <b>Patients' skin/wound cleaning and disinfection</b> | 327 (47) | 1.23 (0.92 – 1.64)                  | 1.17 (0.74 – 1.85)          | 1.03 (0.68 – 1.57)         | 0.71 (0.39 – 1.31)          | <b>1.16 (1.06 – 1.28)**</b>         | 1.55 (0.80 – 3.00)            |
| Disinfect skin areas on patients prior to procedure   |          |                                     |                             |                            |                             |                                     |                               |
| Yes vs No                                             | 253 (36) | <b>1.37 (1.02 – 1.83)*</b>          | 1.46 (0.92 – 2.31)          | <b>1.53 (1.00 – 2.34)*</b> | 0.79 (0.42 – 1.50)          | 1.08 (0.98 – 1.19)                  | 0.94 (0.47 – 1.86)            |
| 0 minutes / week                                      | 444 (74) | 1                                   | 1                           | 1                          | 1                           | 1                                   | 1                             |
| 1 – 99 minutes / week                                 | 96 (16)  | 1.33 (0.87 – 2.02)                  | 1.26 (0.65 – 2.45)          | 1.39 (0.76 – 2.54)         | 1.00 (0.42 – 2.39)          | 1.11 (0.96 – 1.28)                  | 0.50 (0.15 – 1.70)            |
| ≥ 100 minutes / week                                  | 58 (10)  | 1.55 (0.94 – 2.57)                  | <b>2.36 (1.15 – 4.81)*</b>  | <b>2.30 (1.20 – 4.41)*</b> | 0.47 (0.11 – 2.03)          | <b>1.23 (1.03 – 1.47)*</b>          | 1.95 (0.75 – 5.08)            |
| Clean and disinfect wounds                            |          |                                     |                             |                            |                             |                                     |                               |
| Yes vs No                                             | 162 (23) | 1.17 (0.84 – 1.63)                  | 1.19 (0.72 – 1.99)          | 1.02 (0.63 – 1.66)         | 1.03 (0.51 – 2.05)          | <b>1.14 (1.02 – 1.28)*</b>          | <b>2.36 (1.19 – 4.68)*</b>    |
| 0 minutes / week                                      | 535 (90) | 1                                   | 1                           | 1                          | 1                           | 1                                   | 1                             |
| 1 – 99 minutes / week                                 | 39 (6)   | 0.98 (0.52 – 1.88)                  | 0.88 (0.32 – 2.44)          | 0.31 (0.07 – 1.30)         | 0.36 (0.05 – 2.72)          | 1.15 (0.94 – 1.40)                  | 0.59 (0.08 – 4.56)            |
| ≥ 100 minutes / week                                  | 22 (4)   | 1.81 (0.84 – 3.88)                  | <b>3.21 (1.21 – 8.50)*</b>  | 2.42 (0.95 – 6.15)         | 2.55 (0.80 – 8.08)          | <b>1.41 (1.09 – 1.82)**</b>         | <b>7.36 (2.51 – 21.58)***</b> |
| Apply wound dressing                                  |          |                                     |                             |                            |                             |                                     |                               |
| Yes vs No                                             | 143 (21) | 1.19 (0.84 – 1.68)                  | 1.10 (0.64 – 1.88)          | 1.29 (0.79 – 2.11)         | 1.08 (0.53 – 2.19)          | 1.04 (0.92 – 1.17)                  | 0.91 (0.40 – 2.07)            |
| 0 minutes / week                                      | 554 (90) | 1                                   | 1                           | 1                          | 1                           | 1                                   | 1                             |
| 1 – 99 minutes / week                                 | 44 (7)   | 1.14 (0.63 – 2.06)                  | 0.85 (0.32 – 2.30)          | 0.76 (0.29 – 2.00)         | 0.63 (0.15 – 2.74)          | <b>1.22 (1.00 – 1.49)*</b>          | 1.81 (0.58 – 5.61)            |
| ≥ 100 minutes / week                                  | 18 (3)   | 1.34 (0.57 – 3.15)                  | 2.55 (0.88 – 7.37)          | 2.15 (0.74 – 6.26)         | <b>3.60 (1.08 – 11.94)*</b> | 0.99 (0.74 – 1.33)                  | NC                            |
| Use adhesives                                         |          |                                     |                             |                            |                             |                                     |                               |
| Yes vs No                                             | 279 (40) | <b>1.36 (1.02 – 1.83)*</b>          | 1.42 (0.90 – 2.25)          | 1.13 (0.74 – 1.73)         | 0.89 (0.48 – 1.65)          | 1.10 (1.00 – 1.21)                  | 1.51 (0.79 – 2.91)            |
| 0 minutes / week                                      | 418 (69) | 1                                   | 1                           | 1                          | 1                           | 1                                   | 1                             |
| 1 – 99 minutes / week                                 | 154 (26) | <b>1.55 (1.10 – 2.18)*</b>          | 1.44 (0.83 – 2.51)          | 1.17 (0.71 – 1.95)         | 0.53 (0.21 – 1.31)          | <b>1.16 (1.03 – 1.30)*</b>          | 1.82 (0.86 – 3.81)            |
| ≥ 100 minutes / week                                  | 30 (5)   | 1.16 (0.59 – 2.30)                  | 1.89 (0.72 – 5.02)          | 2.04 (0.86 – 4.83)         | 2.47 (0.86 – 7.09)          | 1.09 (0.87 – 1.38)                  | 0.64 (0.08 – 4.99)            |
| Use adhesive removing solvents                        |          |                                     |                             |                            |                             |                                     |                               |
| Yes vs No                                             | 197 (28) | <b>1.50 (1.10 – 2.04)*</b>          | 1.43 (0.88 – 2.31)          | 0.91 (0.57 – 1.46)         | 0.62 (0.30 – 1.29)          | <b>1.15 (1.04 – 1.28)**</b>         | 1.45 (0.72 – 2.91)            |
| 0 minutes / week                                      | 500 (81) | 1                                   | 1                           | 1                          | 1                           | 1                                   | 1                             |
| 1 – 99 minutes / week                                 | 105 (17) | <b>1.74 (1.19 – 2.54)**</b>         | 1.38 (0.75 – 2.53)          | 0.88 (0.48 – 1.61)         | <b>0.23 (0.05 – 0.98)*</b>  | <b>1.24 (1.09 – 1.42)**</b>         | 2.03 (0.92 – 4.49)            |
| ≥ 100 minutes / week                                  | 14 (2)   | 1.63 (0.66 – 4.04)                  | <b>3.47 (1.06 – 11.36)*</b> | 2.06 (0.62 – 6.84)         | 2.24 (0.45 – 11.11)         | 1.04 (0.75 – 1.459)                 | NC                            |

Data are presented as OR (95% CI), unless otherwise indicated. ##: mean ratio (95% CI); OR: odds ratio; CI: confidence interval; †: Geometric mean ratio (95% Confidence Interval); NC: not calculable

Adjusted for atopy, gender and smoking; \*: p-value < 0.05; \*\*: p-value < 0.01; \*\*\*: p-value < 0.001;

WRONS: Work-related ocular–nasal symptoms (ocular–nasal symptoms experienced at work in the past 12 months that gets better when away from work OR worsen on return to work;

WRAS: Work-related asthma symptoms (asthma symptoms experienced at work in the past 12 months that gets better when away from work OR worsen on return to work.

**Table S8: Respiratory symptoms and airway inflammation associated with fixed surface cleaning and disinfection tasks in tertiary hospital health workers**

|                                                       | n (%)    | Asthma symptom score <sup>##</sup> | Asthma symptom score (≥2 vs 0-1) | WRONS              | WRAS               | FeNO, ppb <sup>*</sup><br>(n = 654) | FeNO ≥ 50 ppb<br>(n = 654) |
|-------------------------------------------------------|----------|------------------------------------|----------------------------------|--------------------|--------------------|-------------------------------------|----------------------------|
| <b>Prevalence (%) (n = 697)</b>                       |          |                                    | 91 (13)                          | 109 (16)           | 48 (7)             |                                     | 41 (6)                     |
| <b>Fixed surfaces cleaning and disinfection Tasks</b> | 572 (82) | 1.23 (0.80 – 1.90)                 | 1.41 (0.68 – 2.91)               | 0.92 (0.53 – 1.60) | 1.01 (0.44 – 2.32) | 1.04 (0.92 – 1.19)                  | 0.88 (0.35 – 2.20)         |
| Spray deodorant/ disinfectant                         |          |                                    |                                  |                    |                    |                                     |                            |
| Yes vs No                                             | 208 (30) | 1.24 (0.87 – 1.76)                 | 1.38 (0.79 – 2.41)               | 1.44 (0.83 – 2.52) | 1.15 (0.51 – 2.61) | 1.10 (0.98 – 1.24)                  | 1.51 (0.67 – 3.39)         |
| 0 minutes / week                                      | 489 (78) | 1                                  | 1                                | 1                  | 1                  | 1                                   | 1                          |
| 1 – 99 minutes / week                                 | 128 (20) | 1.48 (0.99 – 2.21)                 | 1.71 (0.93 – 3.16)               | 1.61 (0.87 – 2.96) | 1.08 (0.43 – 2.74) | 1.14 (0.99 – 1.30)                  | 1.62 (0.66 – 3.98)         |
| ≥ 100 minutes / week                                  | 12 (2)   | 0.69 (0.21 – 2.19)                 | 0.56 (0.07 – 4.78)               | 0.62 (0.08 – 5.12) | NC                 | 0.92 (0.65 – 1.31)                  | 1.39 (0.16 – 12.39)        |
| Terminal cleaning of patient rooms                    |          |                                    |                                  |                    |                    |                                     |                            |
| Yes vs No                                             | 159 (23) | 0.83 (0.58 – 1.20)                 | 0.87 (0.49 – 1.54)               | 0.74 (0.40 – 1.34) | 1.13 (0.49 – 2.65) | 0.99 (0.88 – 1.13)                  | 1.05 (0.45 – 2.49)         |
| 0 minutes / week                                      | 538 (87) | 1                                  | 1                                | 1                  | 1                  | 1                                   | 1                          |
| 1 – 99 minutes / week                                 | 59 (10)  | 1.00 (0.60 – 1.66)                 | 1.00 (0.46 – 2.22)               | 1.01 (0.45 – 2.26) | 1.20 (0.37 – 3.86) | 0.97 (0.81 – 1.16)                  | 1.14 (0.35 – 3.67)         |
| ≥ 100 minutes / week                                  | 21 (3)   | 1.12 (0.51 – 2.50)                 | 1.27 (0.39 – 4.21)               | 0.56 (0.13 – 2.50) | 0.73 (0.09 – 5.75) | 1.04 (0.79 – 1.36)                  | 0.84 (0.10 – 6.79)         |

Data are presented as OR (95% CI), unless otherwise indicated. ##: mean ratio (95% CI); OR: odds ratio; CI: confidence interval; \*: Geometric mean ratio (95% Confidence Interval); NC: not calculable

Adjusted for atopy, gender, smoking, age, study site and allergic sensitisation to natural rubber latex; \*: p-value < 0.05; \*\*: p-value < 0.01; \*\*\*: p-value < 0.001;

WRONS: Work-related ocular–nasal symptoms (ocular–nasal symptoms experienced at work in the past 12 months that gets better when away from work OR worsen on return to work;

WRAS: Work-related asthma symptoms (asthma symptoms experienced at work in the past 12 months that gets better when away from work OR worsen on return to work).
